# Supplementary material for: Asian Americans: Diabetes Prevalence Across U.S. and World Health Organization Weight Classifications
Source: Oxford University Press journal article supplement (doi:10.2337/dc09-0573), 2009-06-06
Supplement: dc090573-sup-table_2__online__new.doc [file dc090573-sup-table_2__online__new.doc]

|  | Asian Indian | Chinese | Filipino | Other Asian | Non-Hispanic Whites |
| --- | --- | --- | --- | --- | --- |
| n | 1357 | 1510 | 1485 | 3062 | 140,291 |
| Weighted sum* | 1,234,233 | 1,284,405 | 1,312,902 | 2,628,140 | 116,563,462 |
| % of all Asians | 17.0 | 20.1 | 20.8 | 42.2 | --- |
| % of total population | 0.6 | 0.7 | 0.7 | 1.5 | 52.2 |
| Current age, mean (SE), y | 37.6 (0.4) | 40.7 (0.6) | 41.2 (0.4) | 39.3 (0.5) | 43.7 (0.1) |
| Female, % (SE) | 43.8 (1.5) | 47.5 (1.5) | 52.8 (1.6) | 50.4 (1.2) | 49.5 (0.2) |
| Below federal poverty level, % (SE) | 10.8 (1.7) | 12.0 (1.4) | 6.4 (1.0) | 15.8 (1.1) | 7.5 (0.2) |
| < High School, % (SE) | 10.3 (1.4) | 11.4 (1.0) | 8.1 (0.9) | 13.4 (1.1) | 11.3 (0.2) |
| College, % (SE) | 61.0 (2.4) | 54.5 (2.0) | 44.4 (1.8) | 36.2 (1.1) | 27.2 (0.3) |
| Current smoker, % (SE) | 7.8 (0.7) | 11.2 (1.1) | 15.3 (1.2) | 18.4 (0.8) | 25.6 (0.2) |
| Sedentary physical activity, % (SE) | 39.0 (1.7) | 37.0 (1.3) | 33.7 (1.5) | 37.9 (1.3) | 34.3 (0.3) |
| Foreign-born, % (SE) | 92.5 (1.0) | 80.7 (1.3) | 77.7 (1.5) | 78.8 (2.0) | 4.4 (0.1) |
| Overweight and Obesity Prevalence† | | | | | |
| Overweight (General BMI standard :25.0-29.9 kg/m2) | 34.1 (1.6) | 20.6 (1.1) | 34.5 (1.4) | 25.9 (1.2) | 35.5 (0.1) |
| Overweight (WHO Asian weight standard :23.0-27.4 kg/m2) | 46.7 (1.8) | 38.2 (1.3) | 46.5 (1.7) | 40.7 (1.0) | 39.3 (0.2) |
| Obese (General BMI standard : >30.0 kg/m2) | 6.7 (0.9) | 4.2 (0.6) | 10.2 (1.0) | 7.3 (0.7) | 22.3 (0.2) |
| Obese (WHO Asian weight standard >27.5 kg/m2) | 16.6 (1.4) | 8.8 (0.8) | 20.8 (1.3) | 14.5 (1.0) | 35.8 (0.2) |

Online table. Sample characteristics and prevalence of overweight and obesity by BMI standard and ethnic subgroup

Estimates are based on weighted, unadjusted data; Estimates are proportions (standard error);

All p-values<0.05 when comparing each row of data across ethnic subgroups

*Weighted sum = number of individuals data represents

†Prevalence estimates are age- and sex-standardized to the 2000 U.S. population
